# Supplementary material for: Risk factors for severe lower extremity ischemia following venoarterial extracorporeal membrane oxygenation: an analysis using a nationwide inpatient database
Source: HighWire-hosted journal article supplement (doi:10.1136/tsaco-2021-000776), 2022-04-01
Supplement: tsaco-2021-000776supp001_data_supplement.pdf [file tsaco-2021-000776supp001_data_supplement.pdf]

Supplementary Appendix.

Table S1. Annual Number and Incidence of Patients Who Received Venoarterial Extracorporeal Membrane Oxygenation

| Year    | Overall (n=29,231) |        | Annual patients per<br>100,000 inhabitants | Japanese population<br>(million) |
|---------|--------------------|--------|--------------------------------------------|----------------------------------|
| 2010    | 1,696              | (5.8%) | 1.32                                       | 128.1                            |
| 2011    | 2,605              | (8.9%) | 2.03                                       | 127.8                            |
| 2012    | 3,273              | (11%)  | 2.57                                       | 127.6                            |
| 2013    | 3,479              | (12%)  | 2.73                                       | 127.4                            |
| 2014    | 4,096              | (14%)  | 3.21                                       | 127.3                            |
| 2015    | 4,322              | (15%)  | 3.40                                       | 127.1                            |
| 2016    | 4,716              | (16%)  | 3.71                                       | 127.0                            |
| 2017    | 5,044              | (17%)  | 3.98                                       | 126.8                            |
| Average | 3,654              | (13%)  | 2.87                                       | 127.4                            |

Table S2. Primary Diagnosis, Timing of Venoarterial Extracorporeal Membrane Oxygenation, and Proportions of Intervention and Death According to Level of Consciousness

|                                                                                   | Consciousness on admission |                           |
|-----------------------------------------------------------------------------------|----------------------------|---------------------------|
|                                                                                   | Alert<br>(n=13,624)        | Disturbance<br>(n=15,608) |
| Primary diagnosis                                                                 |                            |                           |
| Cardiogenic shock                                                                 | 11,177 (82%)               | 13,732 (88%)              |
| Septic shock                                                                      | 685 (5.0%)                 | 794 (5.1%)                |
| Hypothermia                                                                       | 20 (0.2%)                  | 278 (1.8%)                |
| Poisoning                                                                         | 14 (0.1%)                  | 118 (0.8%)                |
| Starting VA-ECMO, mean days (±SD)                                                 | 9.6 (28)                   | 2.0 (5.6)                 |
| Leg-intervention†*                                                                | 37 (0.3%)                  | 61 (0.4%)                 |
| Death‡                                                                            | 8,492 (62%)                | 11,878 (76%)              |
| VA-ECMO, venoarterial extracorporeal membrane oxygenation; SD, standard deviation |                            |                           |

Table S3. Additional Data for Age Categories†

|                                                                                                  | Patient age |         |                   |         |                     |         |                     |         |
|--------------------------------------------------------------------------------------------------|-------------|---------|-------------------|---------|---------------------|---------|---------------------|---------|
|                                                                                                  | Overall     |         | Young (≤18 years) |         | Adult (19–59 years) |         | Elderly (≥60 years) |         |
|                                                                                                  | (n=29,231)  |         | (n=948)           |         | (n=9,195)           |         | (n=19,088)          |         |
| Observational period                                                                             | 11          | (2,35)  | 34                | (11,78) | 10                  | (2,35)  | 10                  | (2,33)  |
| Timing of                                                                                        |             |         |                   |         |                     |         |                     |         |
| Leg-intervention*                                                                                | 6           | (2,19)  | 6                 | (4,16)  | 4                   | (2,22)  | 6                   | (2,18)  |
| Death                                                                                            | 4           | (2,12)  | 8                 | (2,24)  | 3                   | (1,9)   | 2                   | (1,8)   |
| Leg intervention during VA-ECMO                                                                  | 26          | (0.09%) | 3                 | (0.32%) | 14                  | (0.15%) | 9                   | (0.05%) |
| Cardiac surgery                                                                                  | 5,618       | (19%)   | 101               | (11%)   | 1,072               | (12%)   | 4,445               | (23%)   |
| †Data was given as median day (IQR). *Timing of fasciotomy or amputation after starting VA-ECMO. |             |         |                   |         |                     |         |                     |         |
| VA-ECMO, venoarterial extracorporeal membrane oxygenation; IQR, interquartile range              |             |         |                   |         |                     |         |                     |         |

Table S4. Demographic Data of Surviving Patients Only Who Received Venoarterial Extracorporeal Membrane Oxygenation Among Age Category

| Demographic data                                         | Patient age                   |                                       |                                           |                                           | <i>p</i> |
|----------------------------------------------------------|-------------------------------|---------------------------------------|-------------------------------------------|-------------------------------------------|----------|
|                                                          | Overall<br>( <i>n</i> =8,861) | Young (≤18 years)<br>( <i>n</i> =427) | Adult (19–59 years)<br>( <i>n</i> =3,158) | Elderly (≥60 years)<br>( <i>n</i> =5,276) |          |
| Sex, <i>n</i> (%)                                        |                               |                                       |                                           |                                           | <0.001   |
| Male                                                     | 6,122 (69)                    | 214 (50)                              | 2,283 (72)                                | 3,625 (69)                                |          |
| Female                                                   | 2,739 (31)                    | 213 (50)                              | 875 (28)                                  | 1,651 (31)                                |          |
| Body mass index (kg/m <sup>2</sup> ), <i>n</i> (%)       |                               |                                       |                                           |                                           | <0.001   |
| Underweight (<18.5)                                      | 1,047 (12)                    | 293 (77)                              | 291 (10)                                  | 463 (9.4)                                 |          |
| Normal weight (18.5–24.9)                                | 4,813 (54)                    | 73 (19)                               | 1,575 (54)                                | 3,165 (64)                                |          |
| Overweight (≥25)                                         | 2,330 (26)                    | 14 (3.7)                              | 1,031 (36)                                | 1,285 (26)                                |          |
| Comorbid conditions at admission, <i>n</i> (%)           |                               |                                       |                                           |                                           |          |
| Diabetes mellitus                                        | 1,905 (22)                    | 4 (0.9)                               | 499 (16)                                  | 1,402 (27)                                | <0.001   |
| Hypertension                                             | 2,471 (28)                    | 11 (2.6)                              | 678 (22)                                  | 1,782 (34)                                | <0.001   |
| Chronic lung disease                                     | 237 (2.7)                     | 10 (2.3)                              | 64 (2.0)                                  | 163 (3.1)                                 | 0.013    |
| Cerebrovascular disease                                  | 378 (4.3)                     | 4 (0.9)                               | 89 (2.0)                                  | 285 (5.4)                                 | <0.001   |
| Cardiac disease                                          | 5,939 (67)                    | 221 (52)                              | 2,111 (67)                                | 3,607 (68)                                | <0.001   |
| Atherosclerotic disease                                  | 2,184 (25)                    | 12 (2.8)                              | 598 (19)                                  | 1,574 (30)                                | <0.001   |
| At least one comorbidity                                 | 7,176 (81)                    | 235 (55)                              | 2,451 (78)                                | 4,490 (85)                                | <0.001   |
| Episode of arrest at admission, <i>n</i> (%)             | 1,051 (12)                    | 35 (8.2)                              | 493 (16)                                  | 523 (9.9)                                 | <0.001   |
| Charlson Comorbidity Index update category, <i>n</i> (%) |                               |                                       |                                           |                                           | <0.001   |
| ≤2                                                       | 8,273 (93)                    | 415 (97)                              | 3,010 (95)                                | 4,848 (92)                                |          |
| ≥3                                                       | 588 (6.6)                     | 12 (2.8)                              | 148 (4.7)                                 | 428 (8.1)                                 |          |
| Consciousness on admission, <i>n</i> (%)                 |                               |                                       |                                           |                                           | <0.001   |
| Alert                                                    | 5,132 (58)                    | 275 (64)                              | 1,515 (48)                                | 3,342 (63)                                |          |
| Disturbance                                              | 3,729 (42)                    | 152 (36)                              | 1,643 (52)                                | 1,934 (37)                                |          |
| Ambulance use, <i>n</i> (%)                              | 5,334 (60)                    | 190 (45)                              | 2,184 (69)                                | 2,960 (56)                                | <0.001   |
| Hospital volume (per year), <i>n</i> (%)                 |                               |                                       |                                           |                                           | <0.001   |
| Low (0.75–17.4)                                          | 2,769 (31)                    | 93 (22)                               | 1,019 (32)                                | 1,657 (31)                                |          |
| Medium (17.5–41.4)                                       | 3,005 (34)                    | 170 (40)                              | 1,063 (34)                                | 1,772 (34)                                |          |
| High (≥41.5)                                             | 3,087 (35)                    | 164 (38)                              | 1,076 (34)                                | 1,847 (35)                                |          |

Table S5.

Duration of Observational Period, Timing of Intervention After Starting Venoarterial Extracorporeal Membrane Oxygenation Among Age Category on Surviving Patients Only†

|                             | Patient age        |                                 |                                     |                                   | <i>p</i> |
|-----------------------------|--------------------|---------------------------------|-------------------------------------|-----------------------------------|----------|
|                             | Overall            | Young                           | Adult                               | Elderly                           |          |
|                             | ( <i>n</i> =8,861) | (≤18 years)<br>( <i>n</i> =427) | (19–60 years)<br>( <i>n</i> =3,158) | (≥60 years)<br>( <i>n</i> =5,276) |          |
| Observational period        | 41 (25,68)         | 59 (32,115)                     | 40 (24,64)                          | 41 (25,67)                        | <0.001   |
| Timing of leg intervention* | 7 (4,22)           | 9 (5,16)                        | 6.5 (3,32)                          | 9.5 (5,22)                        | 0.75     |

† Data was given as median day (IQR). \* Timing of fasciotomy or amputation after starting VA-ECMO.

Table S6.

Sensitivity Analysis of Risk Factors for Severe Lower Extremity Ischemia Following Venoarterial Extracorporeal Membrane Oxygenation on Surviving Patients Only

| Risk factor                                               | Cause-specific hazard ratio | 95% Confidence interval | <i>p</i> |
|-----------------------------------------------------------|-----------------------------|-------------------------|----------|
| Age (years)                                               |                             |                         |          |
| 19–59                                                     | Reference                   |                         |          |
| ≤18                                                       | 3.78                        | 1.44–9.94               | 0.007    |
| ≥60                                                       | 0.60                        | 0.33–1.09               | 0.096    |
| Sex                                                       |                             |                         |          |
| Female                                                    | Reference                   |                         |          |
| Male                                                      | 0.94                        | 0.53–1.68               | 0.843    |
| Body mass index (kg/m <sup>2</sup> )                      |                             |                         |          |
| Normal weight (18.5–24.9)                                 | Reference                   |                         |          |
| Underweight (<18.5)                                       | 0.86                        | 0.35–2.11               | 0.750    |
| Overweight (≥25.0)                                        | 1.35                        | 0.74–2.47               | 0.329    |
| Comorbid conditions                                       |                             |                         |          |
| Diabetes mellitus                                         | 1.05                        | 0.51–2.14               | 0.893    |
| Atherosclerotic disease                                   | 0.93                        | 0.47–1.83               | 0.826    |
| Episode of arrest at admission                            | 0.90                        | 0.42–1.96               | 0.799    |
| VA-ECMO duration (per day)                                | 0.96                        | 0.89–1.04               | 0.344    |
| Consciousness on admission                                |                             |                         |          |
| Alert                                                     | Reference                   |                         |          |
| Disturbance                                               | 2.60                        | 1.47–4.61               | 0.001    |
| VA-ECMO, venoarterial extracorporeal membrane oxygenation |                             |                         |          |

Table S7

## Sensitivity Analysis With Clearer Indications for Venoarterial Extracorporeal Membrane Oxygenation

| Risk factor                                               | Cause-specific hazard ratio | 95% Confidence interval | <i>p</i> |
|-----------------------------------------------------------|-----------------------------|-------------------------|----------|
| Age (years)                                               |                             |                         |          |
| 19–59                                                     | Reference                   |                         |          |
| ≤18                                                       | 3.33                        | 1.06–10.43              | 0.039    |
| ≥60                                                       | 0.53                        | 0.27–1.03               | 0.065    |
| Sex                                                       |                             |                         |          |
| Female                                                    | Reference                   |                         |          |
| Male                                                      | 1.06                        | 0.55–2.03               | 0.854    |
| Body mass index (kg/m <sup>2</sup> )                      |                             |                         |          |
| Normal weight (18.5–24.9)                                 | Reference                   |                         |          |
| Underweight (<18.5)                                       | 1.89                        | 0.80–4.51               | 0.148    |
| Overweight (≥25.0)                                        | 1.33                        | 0.66–2.67               | 0.429    |
| Comorbid conditions                                       |                             |                         |          |
| Diabetes mellitus                                         | 1.57                        | 0.71–3.49               | 0.266    |
| Atherosclerotic disease                                   | 0.34                        | 0.10–1.11               | 0.074    |
| Episode of arrest at admission                            | 1.09                        | 0.47–2.52               | 0.846    |
| VA-ECMO duration (per day)                                | 0.96                        | 0.91–1.02               | 0.157    |
| Consciousness on admission                                |                             |                         |          |
| Alert                                                     | Reference                   |                         |          |
| Disturbance                                               | 2.45                        | 1.24–4.82               | 0.010    |
| VA-ECMO, venoarterial extracorporeal membrane oxygenation |                             |                         |          |

Table S8

Sensitivity Analysis With Excluding Patients Who Did Not Receive Anticoagulants at the Start of Venoarterial Extracorporeal Membrane Oxygenation

| Risk factor                                               | Cause-specific hazard ratio | 95% Confidence interval | <i>p</i> |
|-----------------------------------------------------------|-----------------------------|-------------------------|----------|
| Age (years)                                               |                             |                         |          |
| 19–59                                                     | Reference                   |                         |          |
| ≤18                                                       | 3.13                        | 1.26–7.81               | 0.014    |
| ≥60                                                       | 0.62                        | 0.36–1.06               | 0.079    |
| Sex                                                       |                             |                         |          |
| Female                                                    | Reference                   |                         |          |
| Male                                                      | 0.96                        | 0.56–1.66               | 0.888    |
| Body mass index (kg/m <sup>2</sup> )                      |                             |                         |          |
| Normal weight (18.5–24.9)                                 | Reference                   |                         |          |
| Underweight (<18.5)                                       | 1.48                        | 0.68–3.22               | 0.322    |
| Overweight (≥25.0)                                        | 1.32                        | 0.75–2.30               | 0.337    |
| Comorbid conditions                                       |                             |                         |          |
| Diabetes mellitus                                         | 1.08                        | 0.55–2.11               | 0.826    |
| Atherosclerotic disease                                   | 0.62                        | 0.30–1.27               | 0.194    |
| Episode of arrest at admission                            | 0.75                        | 0.37–1.49               | 0.404    |
| VA-ECMO duration (per day)                                | 0.99                        | 0.96–1.03               | 0.613    |
| Consciousness on admission                                |                             |                         |          |
| Alert                                                     | Reference                   |                         |          |
| Disturbance                                               | 1.73                        | 1.00–2.98               | 0.049    |
| VA-ECMO, venoarterial extracorporeal membrane oxygenation |                             |                         |          |



Table S9

## Sensitivity Analysis With Excluding Patients Who Underwent Cardiac Surgery

| Risk factor                                               | Cause-specific hazard ratio | 95% Confidence interval | <i>p</i> |
|-----------------------------------------------------------|-----------------------------|-------------------------|----------|
| Age (years)                                               |                             |                         |          |
| 19–59                                                     | Reference                   |                         |          |
| ≤18                                                       | 3.25                        | 1.38–7.66               | 0.007    |
| ≥60                                                       | 0.62                        | 0.38–1.01               | 0.053    |
| Sex                                                       |                             |                         |          |
| Female                                                    | Reference                   |                         |          |
| Male                                                      | 1.03                        | 0.63–1.68               | 0.922    |
| Body mass index (kg/m <sup>2</sup> )                      |                             |                         |          |
| Normal weight (18.5–24.9)                                 | Reference                   |                         |          |
| Underweight (<18.5)                                       | 0.70                        | 0.32–1.57               | 0.391    |
| Overweight (≥25.0)                                        | 1.16                        | 0.71–1.90               | 0.551    |
| Comorbid conditions                                       |                             |                         |          |
| Diabetes mellitus                                         | 1.27                        | 0.72–2.24               | 0.412    |
| Atherosclerotic disease                                   | 0.63                        | 0.33–1.20               | 0.161    |
| Episode of arrest at admission                            | 0.70                        | 0.36–1.38               | 0.307    |
| VA-ECMO duration (per day)                                | 0.97                        | 0.92–1.02               | 0.190    |
| Consciousness on admission                                |                             |                         |          |
| Alert                                                     | Reference                   |                         |          |
| Disturbance                                               | 2.05                        | 1.28–3.30               | 0.003    |
| VA-ECMO, venoarterial extracorporeal membrane oxygenation |                             |                         |          |
